# Supplementary material for: Aurora A, MCAK, and Kif18b promote Eg5-independent spindle formation
Source: PubMed Central journal article supplement (PMC5509784; doi:10.1007/s00412-016-0607-4), 2016-06-29
Supplement: 412_2016_607_MOESM3_ESM.pdf [file 412_2016_607_MOESM3_ESM.pdf]

**Supplementary Figure 1. Functional interaction network of the 200 top hits in parental cells.**

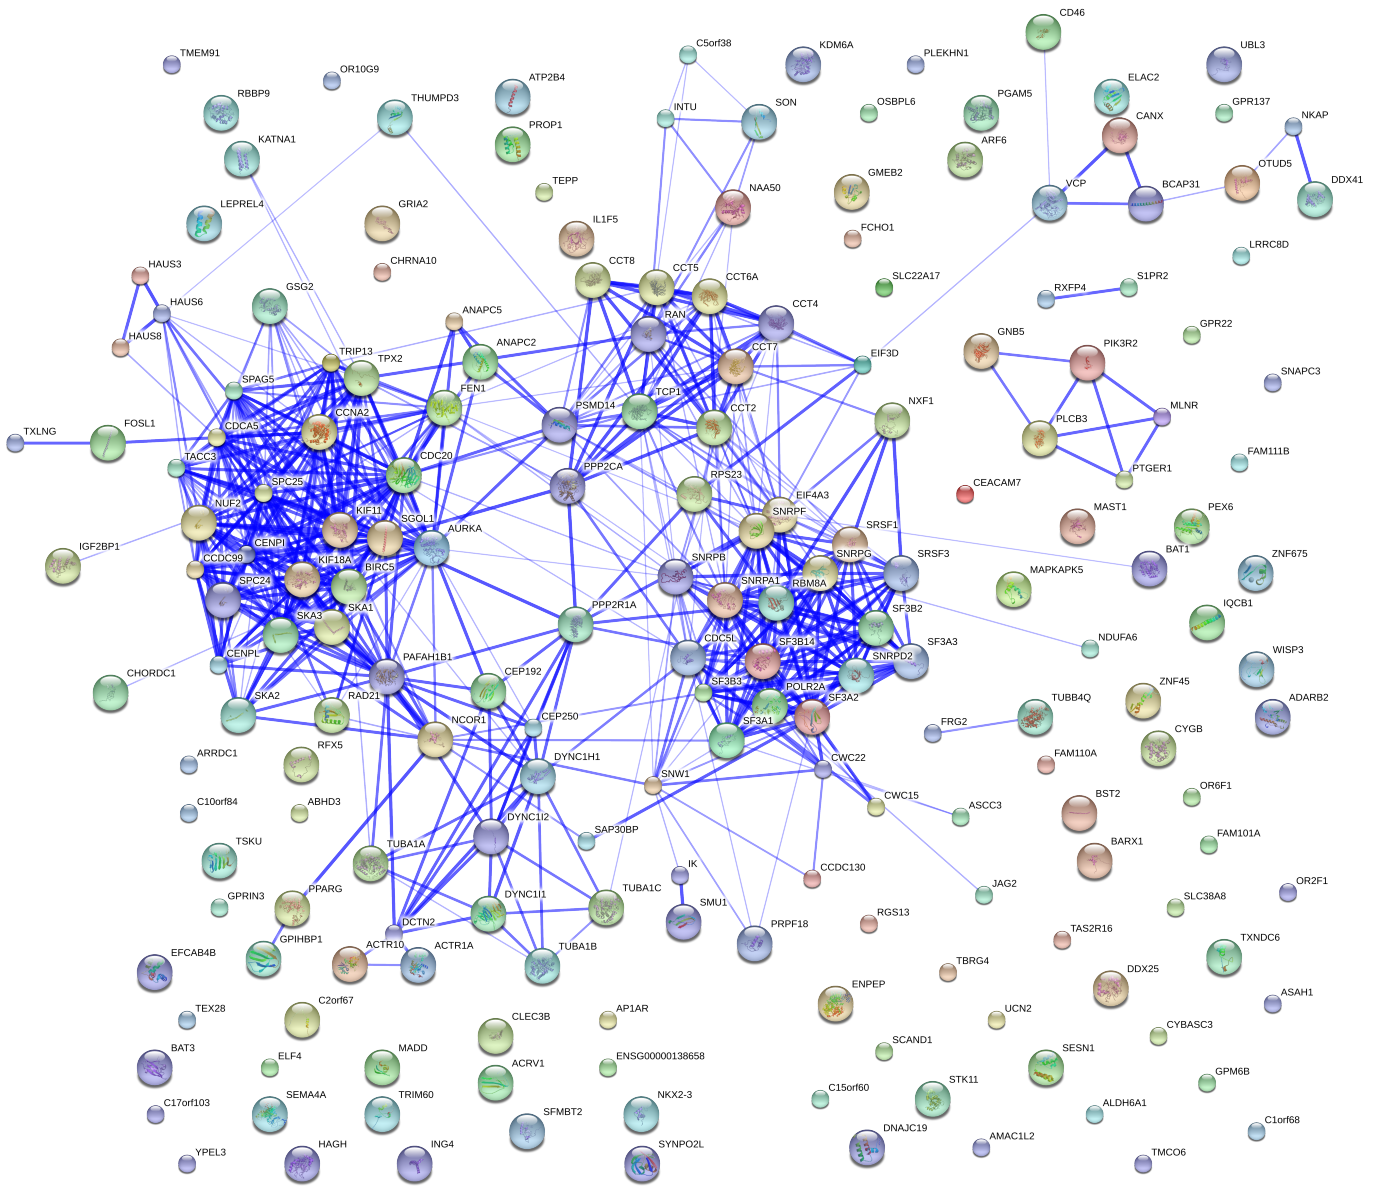

**Supplementary Figure 1. Functional interaction network of the 200 top hits in parental cells.**

Top hits and interaction of the genes scored in parental cells, retrieved by STRING association.
