# Supplementary material for: Aurora A, MCAK, and Kif18b promote Eg5-independent spindle formation
Source: PubMed Central journal article supplement (PMC5509784; doi:10.1007/s00412-016-0607-4), 2016-06-29
Supplement: 412_2016_607_MOESM8_ESM.pdf [file 412_2016_607_MOESM8_ESM.pdf]

**Supplementary Figure 6. Excessive astral MT nucleation blocks centrosome separation and bipolar spindle formation.**

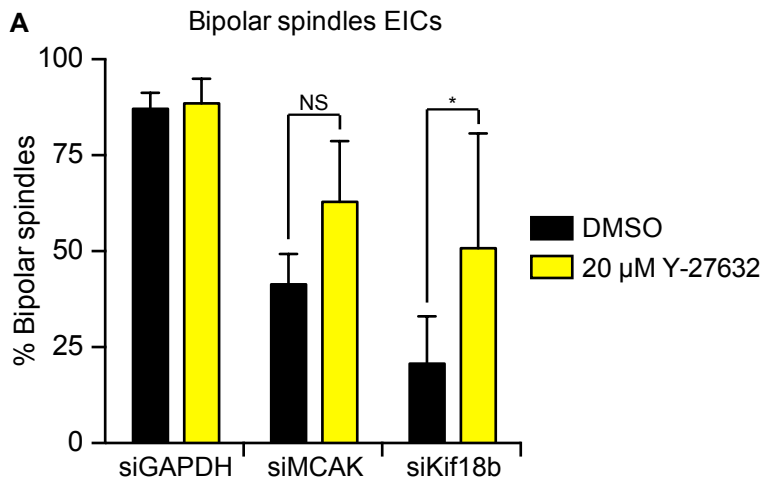

**Supplementary Figure 6. Excessive astral MT nucleation blocks centrosome separation and bipolar spindle formation.**

(A) Quantification of the percentage of bipolar spindles in EICs. The cells were treated with the indicated siRNAs for 48 hrs. DNA was stained using 4 $\mu$ M SiR-DNA and cells were treated with either DMSO or the Rho kinase inhibitor Y-27632. Results are averages of four independent experiments ( $n = > 85$  cells per condition). \*,  $P < 0.01$ ; ns, not significant. p values calculated using two-way ANOVA. Error bars represent s.d.
