# Supplementary material for: Aurora A, MCAK, and Kif18b promote Eg5-independent spindle formation
Source: PubMed Central journal article supplement (PMC5509784; doi:10.1007/s00412-016-0607-4), 2016-06-29
Supplement: 412_2016_607_MOESM9_ESM.pdf [file 412_2016_607_MOESM9_ESM.pdf]

### Supplementary Figure 7. In vitro kinase assay Aurora A and Kif15

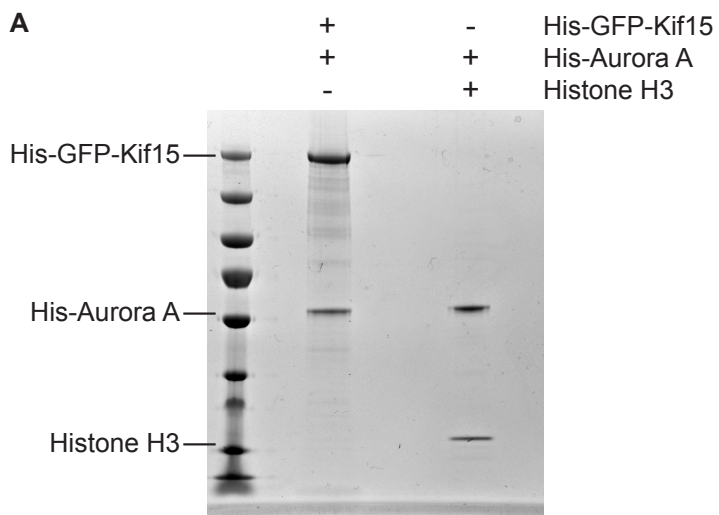

### B

| Position | Target | Highest PTM score | Sequence motif             | Aurora A consensus | In vivo confirmation (reference)                                   |
|----------|--------|-------------------|----------------------------|--------------------|--------------------------------------------------------------------|
| 568      | S      | 100%              | KLGQGF <sub>s</sub> PKALKE | No                 | Dephoure et al., 2008; Olsen et al., 2010; Kettenbach et al., 2011 |
| 1134     | S      | 53.9%             | LEHVMG <sub>s</sub> ATEYPQ | No                 | Kettenbach et al., 2011                                            |
| 1141     | S      | 100%              | ATEYPQ <sub>s</sub> PKTPPH | No                 | Olsen et al., 2010; Kettenbach et al., 2011                        |
| 1144     | T      | 100%              | YPQSPK <sub>t</sub> PPHFQA | No                 | Olsen et al., 2010; Kettenbach et al., 2011                        |
| 1169     | S      | 100%              | IEDGRA <sub>s</sub> KTSLQH | Yes                | Olsen et al., 2010; Kettenbach et al., 2011                        |
| 1171     | T      | 92.9%             | DGRASK <sub>t</sub> SLQHLV | No                 | Kettenbach et al., 2011                                            |
| 1172     | S      | 7.1%              | GRASK <sub>t</sub> SLQHLVT | No                 | Kettenbach et al., 2011                                            |

**Supplementary Figure 7. In vitro kinase assay with Aurora A and Kif15.** (A) 5 µg recombinant mouse His-GFP-Kif15 was mixed with 0.75 µg human His-Aurora (first lane). Second lane contained 1 µg of Histone 3 and 0.75 µg of human His-Aurora A (control). (B) Phosphorylation sites on Kif15, identified by mass-spectrometry. Only sites that were confirmed previously in vivo are shown. Note that only S1169 and S1172 matched the Aurora A consensus site R-X-[S/T].
