# Supplementary material for: Aurora A, MCAK, and Kif18b promote Eg5-independent spindle formation
Source: PubMed Central journal article supplement (PMC5509784; doi:10.1007/s00412-016-0607-4), 2016-06-29
Supplement: 412_2016_607_MOESM10_ESM.pdf [file 412_2016_607_MOESM10_ESM.pdf]

**Supplementary Figure 8. Expression levels of GFP-Kif15 phospho-mutants**

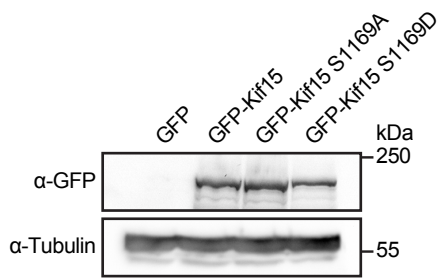

**Supplementary Figure 8. Expression levels of GFP-Kif15 phospho-mutants.**

U2OS cells were transfected with the indicated constructs. Cells were harvested 48 hours after transfection and protein levels were analyzed by western blot.
