# Supplementary material for: Aurora A, MCAK, and Kif18b promote Eg5-independent spindle formation
Source: Chromosoma. 2016 Jun 29;126(4):473–86. doi: 10.1007/s00412-016-0607-4 (PMC5509784; doi:10.1007/s00412-016-0607-4)
Supplement: Supplementary file 4 — (PDF 11714 kb) [file 412_2016_607_MOESM4_ESM.pdf]

**Supplementary Figure 2. Functional interaction network of the 200 top hits in EICs.**

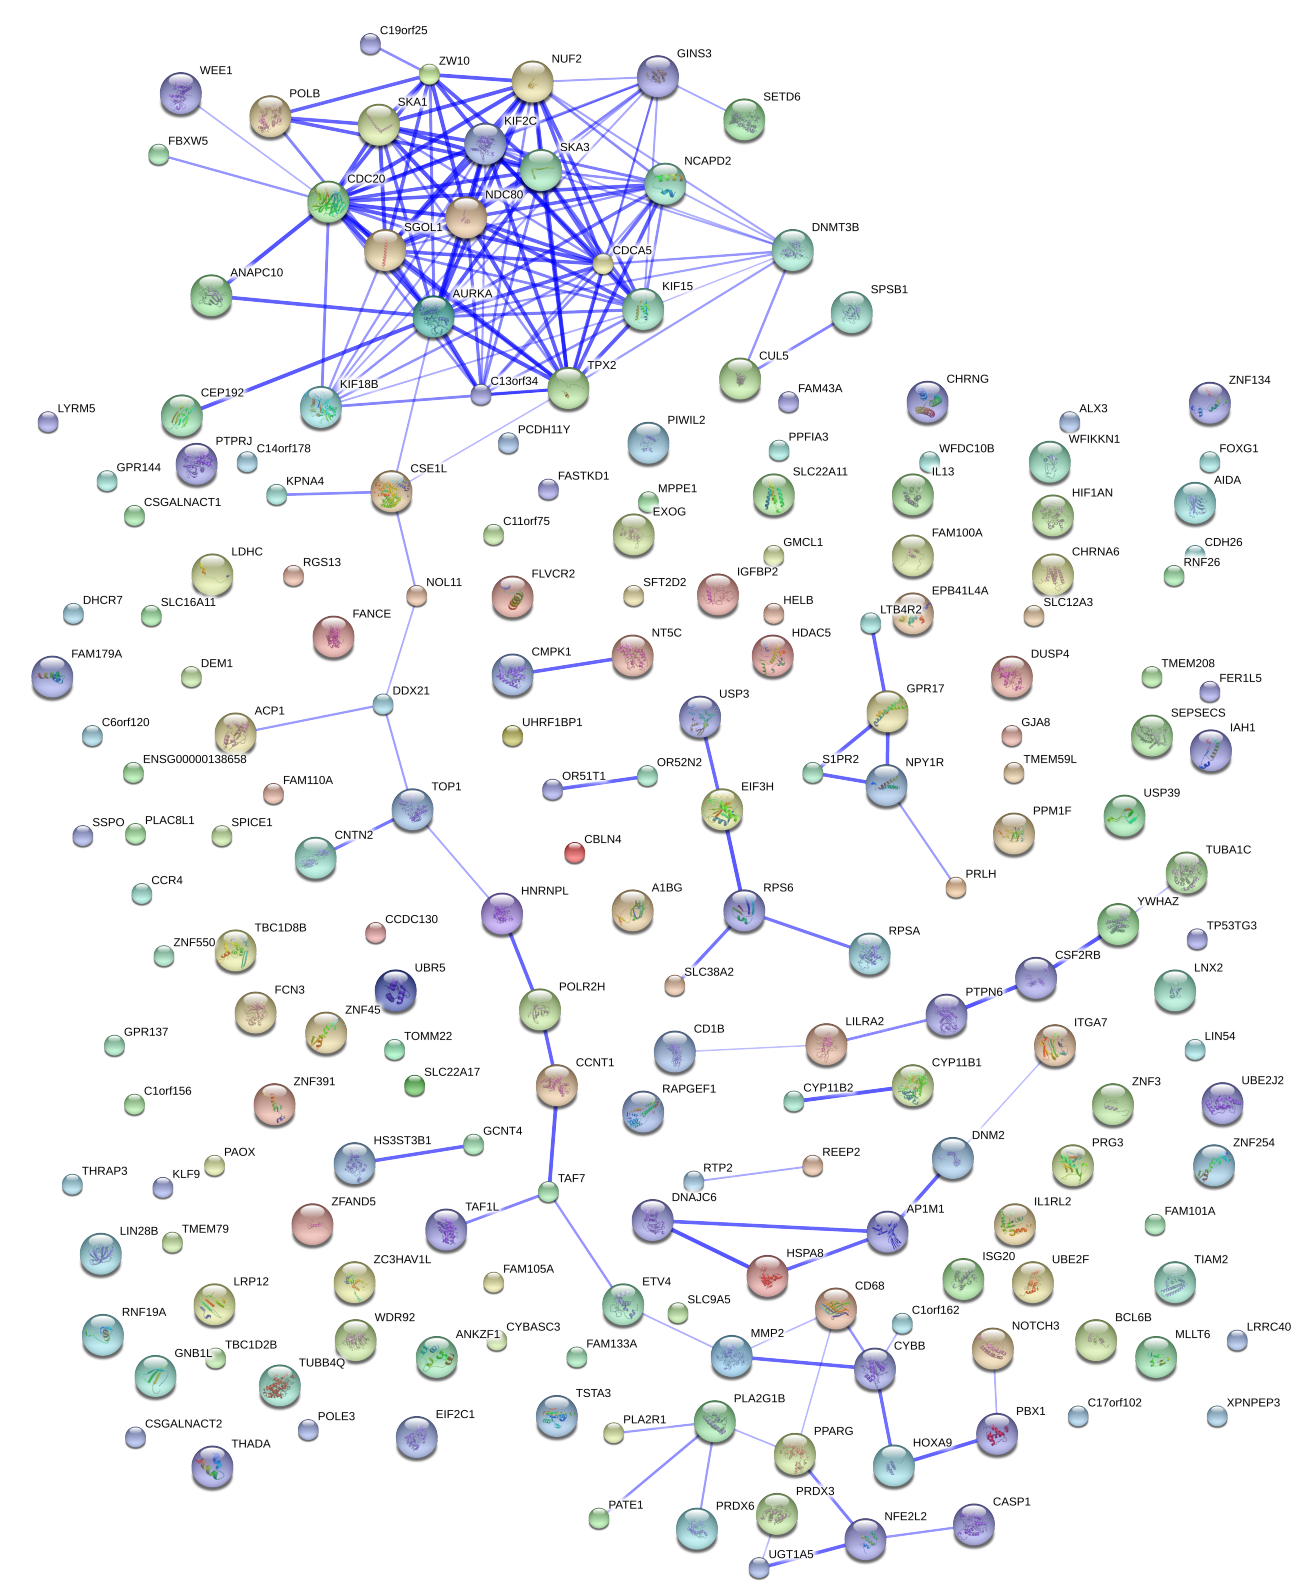

**Supplementary Figure 2. Functional interaction network of the 200 top hits in EICs.**  
Top hits and interaction of the genes scored in EICs, retrieved by STRING association.
