# Supplementary material for: Aurora A, MCAK, and Kif18b promote Eg5-independent spindle formation
Source: Chromosoma. 2016 Jun 29;126(4):473–86. doi: 10.1007/s00412-016-0607-4 (PMC5509784; doi:10.1007/s00412-016-0607-4)
Supplement: Supplementary file 5 — (PDF 309 kb) [file 412_2016_607_MOESM5_ESM.pdf]

**Supplementary Figure 3. Knockdown confirmation of the siRNAs used in this study.**

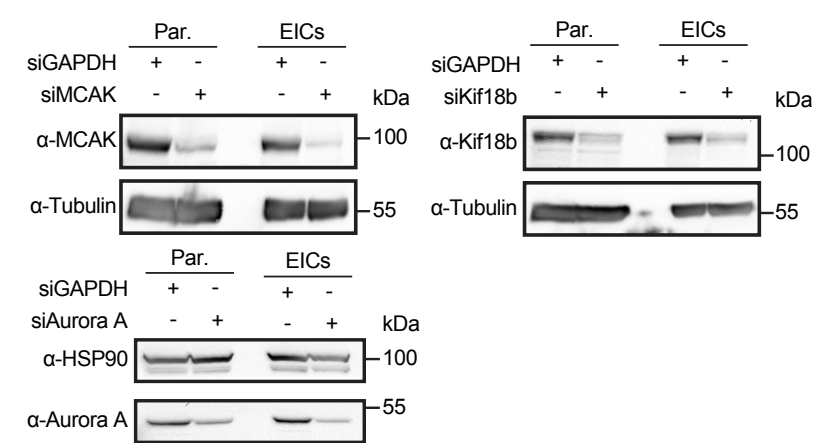

**Supplementary Figure 3. Knockdown confirmation of the siRNAs used in this study.** Parental and EICs cells were transfected with the indicated siRNAs. 48 hr after transfection, the cells were harvested and protein levels were analyzed by western blot.
